# Supplementary material
Source: PubMed Central journal article supplement (PMC4055970)
Supplement: ml100016x_si_001.pdf [file ml100016x_si_001.pdf]

# Supporting Information for

  

## SMARTCyp – a 2D-method for Prediction of Cytochrome P450 Mediated Drug Metabolism

*Patrik Rydberg,<sup>†</sup> David E. Gloriam,<sup>†</sup> Jed Zaretski,<sup>‡</sup> Curt Breneman,<sup>‡</sup> and Lars Olsen<sup>† \*</sup>*

Biostructural Research, Department of Medicinal Chemistry, Faculty of Pharmaceutical Sciences,  
University of Copenhagen, Universitetsparken 2, DK-2100 Copenhagen, Denmark. Center for  
Biotechnology and Interdisciplinary Studies, Department of Chemistry and Chemical Biology,  
Rensselaer Polytechnic Institute, Troy, NY, USA

**Table S1.** SMARTS rules and corresponding energies.

**Table S2.** Structures and information on all QM calculations for all SMARTS rules.

**Table S1.** SMARTS rules and corresponding energies (kJ/mol).

|                                                                                                                                                                                                |      |
|------------------------------------------------------------------------------------------------------------------------------------------------------------------------------------------------|------|
| <b>Sulphur atoms</b>                                                                                                                                                                           |      |
| [SX2H1]                                                                                                                                                                                        | 41.5 |
| [\$([SX2H0]);!\$([S][*^2]);!\$([S][CX4H0])]                                                                                                                                                    | 26.3 |
| [\$([SX2H0][*^2]);!\$([S](~[^2])[^2]);!\$([S][CX4H0])]                                                                                                                                         | 34.4 |
| [\$([S][*D4H0]);\$([SX2H0])]                                                                                                                                                                   | 44.4 |
| [\$([SX2H0]([*^2])[*^2]);!\$([S][CX4H0])]                                                                                                                                                      | 46.9 |
| [sX2r5]                                                                                                                                                                                        | 70.0 |
| [\$([#16X3]=[OX1]);\$([#16]);!\$([#16X3]=[OX1][#6^2](~[#7^2]))]                                                                                                                                | 30.4 |
| [\$([#16X3]=[OX1]);\$([#16]);\$([#16X3]=[OX1][#6^2](~[#7^2]))]                                                                                                                                 | 46.9 |
| <b>Aldehyde carbon atoms</b>                                                                                                                                                                   |      |
| [\$([CX3H1](=O)[#6])]                                                                                                                                                                          | 40.2 |
| <b>Phosphor with double bonded sulphur</b>                                                                                                                                                     |      |
| [\$([PX4]);\$([P]=[S])]                                                                                                                                                                        | 13.3 |
| <b>sp3 hybridized carbon atoms</b>                                                                                                                                                             |      |
| [\$([CX4]([#6^2])([#6^2])[#6^2]);!\$([CH0])]                                                                                                                                                   | 33.1 |
| [\$([CX4][N]);!\$([CH0]);!\$([C][N]([*^2])[*^2]);!\$([C][N]=[#6X3]);!\$([CX4][NX3][C]=[O])]                                                                                                    | 39.8 |
| [!\$([CH0]);\$([CX4]([#6^2])[#6^2]),\$([CX4][#7]=[#6X3]),\$([CX4]([#8])[#8]);!\$([CX4]([#8])[#8][C]=[O])]                                                                                      | 48.6 |
| [\$([CX4][S]);!\$([CH0]);!\$([C][S]=[O])]                                                                                                                                                      | 57.7 |
| [\$([CX4][#6^2]~[#8]),\$([CX4][#6^2](~[#7]~[#7]),\$([CX4][#6^1]),\$([CX4][C^2]=[C^2]-[#6^2]);!\$([CH0]);!\$([CX4][C]=[O][NX3]);!\$([CX4][#6^2]=[#8]-[#8]);!\$([CX4][C^2]([C^2])=[C^2]-[#6^2])] | 60.0 |
| [\$([CX4][O]);!\$([CH0]);!\$([C][O][C]=[O]);!\$([CX4]1[O][C]1)]                                                                                                                                | 62.2 |
| [\$([CX4][#6^2]);!\$([CH0]);!\$([CX4][C]=[O][NX3])]                                                                                                                                            | 66.7 |
| [\$([CX4][#7](~[*^2])~[*^2]);!\$([CH0])]                                                                                                                                                       | 69.1 |
| [\$([CX4][S](=[O])=[O]);!\$([CH0])]                                                                                                                                                            | 69.5 |
| [CX4;CH1,CH2;!\$([CX4][NX3H1][C]=[O])]                                                                                                                                                         | 77.7 |
| [CX4H3;!\$([CX4][NX3H1][C]=[O])]                                                                                                                                                               | 89.6 |
| [\$([CX4][NX3H1][C]=[O]);!\$([CH0])]                                                                                                                                                           | 94.6 |
| <b>sp2 hybridized carbon atoms</b>                                                                                                                                                             |      |
| [\$([CX3H2]);\$([C]=[*^2]-[*^2])]                                                                                                                                                              | 40.1 |
| [\$([CX3H1]);\$([C]=[*^2]-[*^2]);!\$([C](-[*^2])=[*^2]-[*^2])]                                                                                                                                 | 52.4 |
| [\$([cH1]);\$([c](:[#7]):[#7])]                                                                                                                                                                | 55.8 |
| [\$([ch1]);!\$([ch1]1:[c](-[N^3]-[*^2]):[c]:[c]:[c]:[c]1);!\$([c]1:[c]:[c]:[c](-[N^3]-[*^2]):[c]:[c]1);\$([ch1]1:[c](-[N^3]):[c]:[c]:[c]:[c]1),\$([c]1:[c]:[c]:[c](-[N^3]):[c]:[c]1)]          | 59.5 |
| [\$([CX3]);\$([CX3]=[CX3]);!\$([CH0]);!\$([CX3](-[*^2])=[CX3]);!\$([CX3]=[CX3]-[*^2])]                                                                                                         | 65.6 |
| [\$([cH1]);\$([c]:[#16])]                                                                                                                                                                      | 67.1 |
| [\$([ch1]);\$([c]1:[c]:[c]:[c](~[#7X2H0]~[c^2,C^2]):[c]:[c]1),\$([c]1:[c]:[c]:[c](~[#7X3H1]~[c^2,C^2]):[c]:[c]1);!\$([c]1:[c]:[c]:[c](-[NH]-[C]=[O]):[c]:[c]1)]                                | 69.2 |
| [\$([ch1]);!\$([c]1:[c]:[c]:[c](-[O]-[C]=[O]):[c]:[c]1),\$([c]1:[c]:[c]:[c](-[NH]-[C]=[O]):[c]:[c]1),                                                                                          | 75.3 |

|                                                                                                                                                                                                                                                                                                                                                                                                    |      |
|----------------------------------------------------------------------------------------------------------------------------------------------------------------------------------------------------------------------------------------------------------------------------------------------------------------------------------------------------------------------------------------------------|------|
| $\$(\text{[c]1}:\text{[c]}:\text{[c]}:\text{[c]}(-[\text{O},\text{SX2}]):\text{[c]}:\text{[c]1})$                                                                                                                                                                                                                                                                                                  |      |
| $[\$(\text{[ch1]}); \$(\text{[c]1}:\text{[c]}:\text{[#16]}:\text{[c]}:\text{[c]1})]$                                                                                                                                                                                                                                                                                                               | 76.7 |
| $[\$(\text{[ch1]}); \$(\text{[ch1]1}:\text{[c]}(\sim\text{[#7X2H0]}\sim\text{[c}^2,\text{C}^2]):\text{[c]}:\text{[c]}:\text{[c]}:\text{[c]1}), \$(\text{[ch1]1}:\text{[c]}(\sim\text{[#7X3H1]}\sim\text{[c}^2,\text{C}^2]):\text{[c]}:\text{[c]}:\text{[c]}:\text{[c]1})$<br>$, \$(\text{[ch1]}:\text{[c]}-[\text{O},\text{SX2}]); !\$(\text{[ch1]}:\text{[c]}-[\text{O}]-[\text{C}]=[\text{O}])]$ | 77.3 |
| $[\$(\text{[CX3H1},\text{cX3H1}]); !\$(\text{[ch1]1}:\text{[c]}:\text{[c]}:\text{[#7]}:\text{[c]}:\text{[c]1}); !\$(\text{[ch1]1}:\text{[c]}:\text{[#7]}:\text{[c]}:\text{[c]}:\text{[c]1}); !\$(\text{[ch1]1}:\text{[c]}:\text{[#7]}:\text{[c]}:\text{[c]1}); !\$(\text{[ch1]}:\text{[#7]})]$                                                                                                     | 82.3 |
| $[\$(\text{[ch1]1}:\text{[c]}:\text{[c]}:\text{[#7]}:\text{[c]}:\text{[c]1}), \$(\text{[ch1]1}:\text{[c]}:\text{[#7]}:\text{[c]}:\text{[c]}:\text{[c]1}), \$(\text{[ch1]1}:\text{[c]}:\text{[#7]}:\text{[c]}:\text{[c]1}), \$(\text{[ch1]}:\text{[#7]})]$                                                                                                                                          | 89.6 |
| <b>Nitrogen atoms</b>                                                                                                                                                                                                                                                                                                                                                                              |      |
| $[\$(\text{[N}^3\text{H0}]); !\$(\text{[N}^3][^*^2])]$                                                                                                                                                                                                                                                                                                                                             | 41.0 |
| $[\$(\text{[N}^3]); \$(\text{[H1},\text{H2}])]$                                                                                                                                                                                                                                                                                                                                                    | 54.1 |
| $[\$(\text{[N]}(\text{[#6}^2]1)[\text{#6}^2]=[\text{#6}^2][\text{#6}^3][\text{#6}^2]=1)]$                                                                                                                                                                                                                                                                                                          | 61.9 |
| $[\$(\text{[N}^3\text{H0}]); \$(\text{[N}^3][^*^2]); !\$(\text{[N}^3][(^*^2)][^*^2])]$                                                                                                                                                                                                                                                                                                             | 63.9 |
| $[\$(\text{[nr6]}), \$(\text{[N}^2]=[\text{C}])]$                                                                                                                                                                                                                                                                                                                                                  | 75.6 |
| $[\$(\text{[N]}); \$(\text{[NX3H0]}(\text{[^*^2]}[^*^2]), \$(\text{[N}^2\text{H1]}[\text{C}]=[\text{O}])]$                                                                                                                                                                                                                                                                                         | 89.6 |
| $[\text{nr5H0}]$                                                                                                                                                                                                                                                                                                                                                                                   | 92.1 |

**Table S2.** Structures and information on all QM calculations for all SMARTS rules. Spin state in parenthesis after compound name (d is doublet, q is quartet). If there are multiple possible sites the computed site is marked with the number 1 unless otherwise written.

| <b>Sulphur Oxidations</b>                                     |  |                        |
|---------------------------------------------------------------|--|------------------------|
| <b>[SX2H1]</b>                                                |  | <b>Energy (kJ/mol)</b> |
| Methylsulfane (d)                                             |  | 41.5                   |
| <b>[\$([SX2H0]);!\$([S][*^2]);!\$([S][CX4H0])]</b>            |  | <b>Energy (kJ/mol)</b> |
| Methylethylsulfane (d)                                        |  | 28.7 <sup>a</sup>      |
| Dimethylsulfane (d)                                           |  | 23.8 <sup>b</sup>      |
| Average:                                                      |  | 26.3                   |
| Standard deviation:                                           |  | 3.5                    |
| <b>[\$([SX2H0][*^2]);!\$([S](~[^2])[^2]);!\$([S][CX4H0])]</b> |  | <b>Energy (kJ/mol)</b> |
| Phenylmethylsulfane (d)                                       |  | 33.8 <sup>a</sup>      |
| Vinylmethylsulfane (d)                                        |  | 35.0 <sup>a</sup>      |
| Average:                                                      |  | 34.4                   |
| Standard deviation:                                           |  | 0.9                    |
| <b>[\$([S][*D4H0]);\$([SX2H0])]</b>                           |  | <b>Energy (kJ/mol)</b> |
| Tertbutylmethylsulfane (d)                                    |  | 44.4 <sup>a</sup>      |
| <b>[\$([SX2H0]([*^2])[*^2]);!\$([S][CX4H0])]</b>              |  | <b>Energy (kJ/mol)</b> |
| Divinylsulfane (d)                                            |  | 45.1 <sup>a</sup>      |

|                                                                 |                                                                                     |                        |
|-----------------------------------------------------------------|-------------------------------------------------------------------------------------|------------------------|
| Dibenzo[b,f]thiepine (d)                                        | 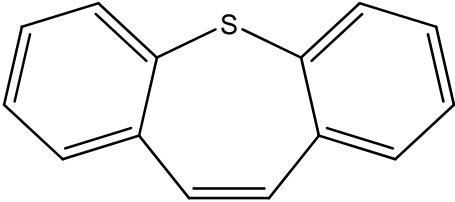  | 48.8 <sup>a</sup>      |
| Average:                                                        |                                                                                     | 46.9                   |
| Standard deviation:                                             |                                                                                     | 2.6                    |
| <b>[sX2r5]</b>                                                  |                                                                                     | <b>Energy (kJ/mol)</b> |
| Thiophene (d)                                                   |    | 69.1                   |
| Thiazole (d)                                                    |    | 74.0                   |
| Isothiazole (d)                                                 |   | 66.9                   |
| Average:                                                        |                                                                                     | 70.0                   |
| Standard deviation:                                             |                                                                                     | 3.6                    |
| <b>[(#16X3)(=[OX1]);!(#16);!(#16X3)(=[OX1])[#6^2](~[#7^2])]</b> |                                                                                     | <b>Energy (kJ/mol)</b> |
| Dimethylsulfoxide (d)                                           |  | 27.3 <sup>b</sup>      |
| Methylsulfinylethane (d)                                        |  | 25.3 <sup>a</sup>      |
| Methylsulfinylisopropane (d)                                    |  | 33.6 <sup>a</sup>      |

|                                                                                                              |                                                                                      |                        |
|--------------------------------------------------------------------------------------------------------------|--------------------------------------------------------------------------------------|------------------------|
| Methylsulfinyltertbutane (d)                                                                                 | 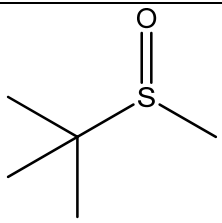     | 34.8 <sup>a</sup>      |
| Methylsulfinylbenzene (d)                                                                                    |     | 31.3 <sup>a</sup>      |
| Methylsulfinylethene (d)                                                                                     |     | 27.4 <sup>a</sup>      |
| Divinylsulfoxide (d)                                                                                         |     | 32.8 <sup>a</sup>      |
| Average:                                                                                                     |                                                                                      | 30.4                   |
| Standard deviation:                                                                                          |                                                                                      | 3.7                    |
| $[\$(\text{[#16X3]}(=\text{[OX1]}));\$(\text{[#16]});\$(\text{[#16X3]}(=\text{[OX1]})[\#6^2](\sim[\#7^2]))]$ |                                                                                      | <b>Energy (kJ/mol)</b> |
| 2-(ethylsulfinyl)-1H-benzo[d]imidazole (d)                                                                   |  | 46.9 <sup>a</sup>      |
| <b>Aldehyde oxidation (of C=O carbon)</b>                                                                    |                                                                                      |                        |
| $[\$(\text{[CX3H1]}(=\text{O})[\#6])]$                                                                       |                                                                                      | <b>Energy (kJ/mol)</b> |
| Propionaldehyde (q)                                                                                          |   | 37.0                   |
| Acrylaldehyde (q)                                                                                            |   | 42.5                   |
| Benzaldehyde (q)                                                                                             |   | 41.1                   |
| Average:                                                                                                     |                                                                                      | 40.2                   |
| Standard deviation:                                                                                          |                                                                                      | 2.8                    |

**Phosphor with double bonded sulphur (desulphurization)**

| <b>Energy (kJ/mol)</b>                                        |                                                                                     | <b>Energy (kJ/mol)</b> |
|---------------------------------------------------------------|-------------------------------------------------------------------------------------|------------------------|
| <b>Phosphor with double bonded sulphur (desulphurization)</b> |                                                                                     |                        |
| <b>[[PX4]];[[P]=[S]]</b>                                      |                                                                                     |                        |
| O,O,O-trimethyl phosphorothioate (d)                          | 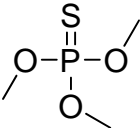   | 13.3 <sup>c</sup>      |
| <b>Nitrogen oxidations</b>                                    |                                                                                     |                        |
| <b>[[N^3H0]];![[N^3][*^2]]</b>                                |                                                                                     | <b>Energy (kJ/mol)</b> |
| Trimethylamine (d)                                            |    | 39.8 <sup>b</sup>      |
| N-ethyl-dimethylamine (d)                                     |    | 42.3                   |
| Average:                                                      |                                                                                     | 41.0                   |
| Standard deviation:                                           |                                                                                     | 1.7                    |
| <b>[[N^3]];[[H1,H2]]</b>                                      |                                                                                     | <b>Energy (kJ/mol)</b> |
| Propane-2-amine (d)                                           |  | 51.6 <sup>a</sup>      |
| Propene-2-amine (d)                                           |  | 55.9 <sup>a</sup>      |
| Aniline (d)                                                   |  | 56.3                   |
| N-methylaniline (d)                                           |  | 50.0                   |
| 1,3-dimethylguanidine (d)                                     |  | 56.9 <sup>a</sup>      |

|                                                |                                                                                     |                        |
|------------------------------------------------|-------------------------------------------------------------------------------------|------------------------|
| Average:                                       |                                                                                     | 54.1                   |
| Standard deviation:                            |                                                                                     | 3.1                    |
| [ $([N]([6^2]1)[6^2]=[6^2][6^3][6^2]=1)$ ]     |                                                                                     | <b>Energy (kJ/mol)</b> |
| 1-methyl-4-hydropyridine (d)                   | 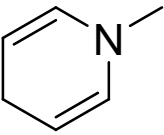   | 61.9                   |
| [ $([N^3H0]);([N^3][^2]);!([N^3]([^2])[^2])$ ] |                                                                                     | <b>Energy (kJ/mol)</b> |
| <i>N,N</i> -dimethylaniline (d)                |    | 62.5                   |
| <i>N,N</i> -dimethylethenamine (d)             |    | 65.3                   |
| Average:                                       |                                                                                     | 63.9                   |
| Standard deviation:                            |                                                                                     | 2.0                    |
| [ $([nr6]),([N^2]=[C])$ ]                      |                                                                                     | <b>Energy (kJ/mol)</b> |
| Quinoline (d)                                  |  | 72.7                   |
| 5-fluoro-4-methylpyrimidine (d)                |  | 83.5                   |
| Pyridine (d)                                   |  | 71.0                   |



|                                                                                                                                                                                   |                                                                                     |                        |
|-----------------------------------------------------------------------------------------------------------------------------------------------------------------------------------|-------------------------------------------------------------------------------------|------------------------|
| Pyridazine (d)                                                                                                                                                                    | 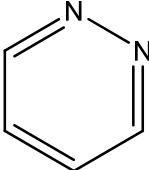   | 75.0                   |
| Average:                                                                                                                                                                          |                                                                                     | 75.6                   |
| Standard deviation:                                                                                                                                                               |                                                                                     | 5.5                    |
| [ $[\text{N}]$ ]; $[\text{NX3H0}][^*^2][^*^2]$ , $[\text{N}^2\text{H1}][\text{C}=\text{O}]$                                                                                       |                                                                                     | <b>Energy (kJ/mol)</b> |
| <i>N,N</i> -divinylmethaneamine (d)                                                                                                                                               |    | 93.1                   |
| <i>N</i> -methylformamide (d)                                                                                                                                                     |    | 86.2                   |
| Average:                                                                                                                                                                          |                                                                                     | 89.6                   |
| Standard deviation:                                                                                                                                                               |                                                                                     | 4.9                    |
| [nr5H0]                                                                                                                                                                           |                                                                                     | <b>Energy (kJ/mol)</b> |
| Imidazole (d)                                                                                                                                                                     |   | 85.8                   |
| Thiazole (d)                                                                                                                                                                      |  | 88.4                   |
| Isothiazole (d)                                                                                                                                                                   |  | 102.1                  |
| Average:                                                                                                                                                                          |                                                                                     | 92.1                   |
| Standard deviation:                                                                                                                                                               |                                                                                     | 9.4                    |
| <b>sp<sup>3</sup> carbons</b>                                                                                                                                                     |                                                                                     |                        |
| [ $[\text{CX4}][\#6^2][\#6^2][\#6^2]$ ];! $[\text{CH0}]$                                                                                                                          |                                                                                     | <b>Energy (kJ/mol)</b> |
| 3-vinylpenta-1,4-diene (q)                                                                                                                                                        |  | 33.1                   |
| [ $[\text{CX4}][\text{N}]$ ];! $[\text{CH0}]$ ;! $[\text{C}][\text{N}][^*^2][^*^2]$ ;<br>! $[\text{C}][\text{N}]=[\#6\text{X3}]$ ;! $[\text{CX4}][\text{NX3}][\text{C}=\text{O}]$ |                                                                                     | <b>Energy (kJ/mol)</b> |

|                                    |                                                                                     |                   |
|------------------------------------|-------------------------------------------------------------------------------------|-------------------|
| 1-ethyl-4-methylpiperidine (q) (1) | 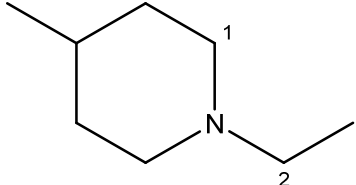  | 35.9              |
| 1-ethyl-4-methylpiperidine (q) (2) |   | 37.5              |
| 1,4-diethylpiperazine (q) (1)      |   | 44.5              |
| 1,4-diethylpiperazine (q) (2)      |  | 39.6              |
| Trimethylamine (q)                 |  | 38.4 <sup>b</sup> |
| N-ethyl –dimethylamine (q) (1)     |  | 38.8              |
| N-ethyl –dimethylamine (q) (2)     |  | 37.1              |
| <i>N,N</i> -dimethyl aniline (q)   |  | 40.7 <sup>d</sup> |
| <i>N</i> -methyl aniline (q)       |  | 44.0 <sup>d</sup> |
| Dimethylpropenamine (q)            |  | 32.9              |

|                                                                                                                                                                                                |                                                                                     |                        |
|------------------------------------------------------------------------------------------------------------------------------------------------------------------------------------------------|-------------------------------------------------------------------------------------|------------------------|
| N-ethyl-methylamine (q) (1)                                                                                                                                                                    | 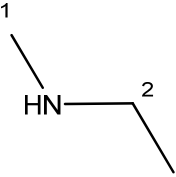   | 41.9                   |
| N-ethyl-methylamine (q) (2)                                                                                                                                                                    |    | 39.5                   |
| Dimethylamine (q)                                                                                                                                                                              |    | 42.6 <sup>d</sup>      |
| Ethanamine (q) (1)                                                                                                                                                                             |    | 43.5                   |
| Average:                                                                                                                                                                                       |                                                                                     | 39.8                   |
| Standard deviation:                                                                                                                                                                            |                                                                                     | 3.3                    |
| [!\$([CH0]);\$(CX4)(#6^2)(#6^2),\$(CX4)[#7]=[#6X3),<br>\$(CX4)(#8)[#8];!\$(CX4)(#8)[#8][C]=[O]]                                                                                                |                                                                                     | <b>Energy (kJ/mol)</b> |
| N-ethylideneethaneamine (q)                                                                                                                                                                    |    | 48.6                   |
| Penta-1,4-diene (q)                                                                                                                                                                            |    | 48.4                   |
| 1,3-dioxolane (q)                                                                                                                                                                              |  | 48.7                   |
| Average:                                                                                                                                                                                       |                                                                                     | 48.6                   |
| Standard deviation:                                                                                                                                                                            |                                                                                     | 0.1                    |
| [\$(CX4)[S];!\$(CH0);!\$(C)[S]=[O]]                                                                                                                                                            |                                                                                     | <b>Energy (kJ/mol)</b> |
| Dimethylsulfane (q)                                                                                                                                                                            |  | 58.1 <sup>b</sup>      |
| Methyl(phenyl)sulfane (q)                                                                                                                                                                      |  | 57.3 <sup>d</sup>      |
| Average:                                                                                                                                                                                       |                                                                                     | 57.7                   |
| Standard deviation:                                                                                                                                                                            |                                                                                     | 0.5                    |
| [\$(CX4)[#6^2]~[#8),\$(CX4)[#6^2](~[#7])~[#7]),\$(CX4)[#6^1),<br>\$(CX4)[C^2]=[C^2]-[#6^2]);!\$(CH0);!\$(CX4)[C](=[O])[NX3]);<br>!\$(CX4)[#6^2](=[#8])-[#8];!\$(CX4)[C^2]([C^2])=[C^2]-[#6^2]] |                                                                                     | <b>Energy (kJ/mol)</b> |
| Pent-2-yne (q)                                                                                                                                                                                 |  | 62.3                   |

|                                                            |                                                                                     |                        |
|------------------------------------------------------------|-------------------------------------------------------------------------------------|------------------------|
| Penta-1,3-diene (q)                                        | 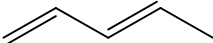   | 57.7                   |
| 2-methyl-1 <i>H</i> -imidazole (q)                         |    | 59.1                   |
| Propionaldehyde (q)                                        |    | 61.3                   |
| Prop-1-en-2-ol (q)                                         |    | 59.4 <sup>d</sup>      |
| Average:                                                   |                                                                                     | 60.0                   |
| Standard deviation:                                        |                                                                                     | 1.8                    |
| <b>[\$([CX4][O]);!(CH0);!(C)[O][C]=[O];!(CX4)1[O][C]1]</b> |                                                                                     | <b>Energy (kJ/mol)</b> |
| Isopropanol (q)                                            |    | 55.7                   |
| Dimethylether (q)                                          |    | 63.1 <sup>d</sup>      |
| Anisole (q)                                                |   | 68.0 <sup>d</sup>      |
| Average:                                                   |                                                                                     | 62.2                   |
| Standard deviation:                                        |                                                                                     | 6.2                    |
| <b>[\$([CX4][#6^2]);!(CH0);!(CX4)[C](=[O])[NX3]</b>        |                                                                                     | <b>Energy (kJ/mol)</b> |
| Propene (q)                                                |  | 67.0 <sup>d</sup>      |
| 2-fluoro-prop-1-ene (q)                                    |  | 69.1 <sup>d</sup>      |
| Toluene (q)                                                |  | 67.3 <sup>d</sup>      |
| Ethylbenzene (q)                                           |  | 64.6 <sup>d</sup>      |
| 1-methylethylbenzene (q)                                   |  | 69.7 <sup>d</sup>      |
| Para-xylene (q)                                            |  | 65.9 <sup>d</sup>      |

|                                                 |                                                                                     |                        |
|-------------------------------------------------|-------------------------------------------------------------------------------------|------------------------|
| 1-methyl-4-nitro-benzene (q)                    | 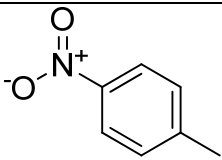    | 62.6 <sup>d</sup>      |
| Propionic acid (q)                              |    | 67.2                   |
| Average:                                        |                                                                                     | 66.7                   |
| Standard deviation:                             |                                                                                     | 2.3                    |
| <b>[\$([CX4][#7](~[*^2])~[*^2]);!\$([CH0])]</b> |                                                                                     | <b>Energy (kJ/mol)</b> |
| 1-methyl-1 <i>H</i> -tetrazole (q)              |    | 65.7                   |
| Caffeine (q) (1)                                |    | 75.8 <sup>e</sup>      |
| Caffeine (q) (2)                                |   | 70.1 <sup>e</sup>      |
| Caffeine (q) (3)                                |  | 64.7 <sup>e</sup>      |
| Average:                                        |                                                                                     | 69.1                   |
| Standard deviation:                             |                                                                                     | 5.0                    |
| <b>[\$([CX4][S](=[O])=[O]);!\$([CH0])]</b>      |                                                                                     | <b>Energy (kJ/mol)</b> |
| Methylethylsulfone (q)                          |  | 69.5                   |
| <b>[CX4;CH1,CH2;!\$([CX4][NX3H1][C]=[O])]</b>   |                                                                                     | <b>Energy (kJ/mol)</b> |

|                                         |                                                                                     |                        |
|-----------------------------------------|-------------------------------------------------------------------------------------|------------------------|
| Ethyl propionate (q)                    | 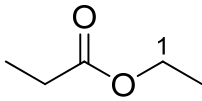   | 81.9                   |
| N-methylacetamide (q)                   |    | 81.7                   |
| N,N-diethylacetamide (q)                |    | 79.6                   |
| 2,3-diethyloxirane (q)                  |    | 73.0                   |
| Dimethylsulphoxide (q)                  |    | 77.0 <sup>b</sup>      |
| Propane (q)                             |    | 77.0 <sup>d</sup>      |
| Isobutane (q)                           |    | 74.7 <sup>d</sup>      |
| Fluoroethane (q)                        |  | 76.5 <sup>d</sup>      |
| Average:                                |                                                                                     | 77.7                   |
| Standard deviation:                     |                                                                                     | 2.3                    |
| <b>[CX4H3;!\$(CX4)[NX3H1][C]=[O]]</b>   |                                                                                     | <b>Energy (kJ/mol)</b> |
| Propane (q)                             |  | 88.4 <sup>d</sup>      |
| Fluoroethane (q)                        |  | 93.0 <sup>d</sup>      |
| Ethylbenzene (q)                        |  | 87.4 <sup>d</sup>      |
| Average:                                |                                                                                     | 89.6                   |
| Standard deviation:                     |                                                                                     | 3.0                    |
| <b>!\$(CX4)[NX3H1][C]=[O];!\$(CH0)]</b> |                                                                                     | <b>Energy (kJ/mol)</b> |

|                                                                                                                              |                                                                                      |                        |
|------------------------------------------------------------------------------------------------------------------------------|--------------------------------------------------------------------------------------|------------------------|
| <i>N</i> -ethylacetamide (q)                                                                                                 | 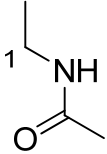    | 94.6                   |
| <b>sp<sup>2</sup> carbons</b>                                                                                                |                                                                                      |                        |
| <b>[<math>\\$(\text{CX3H2})</math>;<math>\\$(\text{C}=[*^2]-[*^2])</math>]</b>                                               |                                                                                      | <b>Energy (kJ/mol)</b> |
| Penta-1,3-diene (q)                                                                                                          |     | 44.0                   |
| Hepta-1,3,5-triene (q)                                                                                                       |    | 29.3                   |
| Acrylaldehyde (q)                                                                                                            |     | 42.2                   |
| Styrene (q)                                                                                                                  |     | 44.9                   |
| Average:                                                                                                                     |                                                                                      | 40.1                   |
| Standard deviation:                                                                                                          |                                                                                      | 7.3                    |
| <b>[<math>\\$(\text{CX3H1})</math>;<math>\\$(\text{C}=[*^2]-[*^2])</math>;<math>\!(\text{C}(-[*^2])=[*^2]-[*^2])</math>]</b> |                                                                                      | <b>Energy (kJ/mol)</b> |
| Penta-1,3-diene (q)                                                                                                          |   | 52.5                   |
| Methylstyrene (q)                                                                                                            |  | 52.3                   |
| Average:                                                                                                                     |                                                                                      | 52.4                   |
| Standard deviation:                                                                                                          |                                                                                      | 0.1                    |
| <b>[<math>\\$(\text{cH1})</math>;<math>\\$(\text{c}(:[#7]):[#7])</math>]</b>                                                 |                                                                                      | <b>Energy (kJ/mol)</b> |

|                                                                                                                                                                                                                                                                                                                                                                                                                              |                                                                                     |                        |
|------------------------------------------------------------------------------------------------------------------------------------------------------------------------------------------------------------------------------------------------------------------------------------------------------------------------------------------------------------------------------------------------------------------------------|-------------------------------------------------------------------------------------|------------------------|
| Caffeine (d)                                                                                                                                                                                                                                                                                                                                                                                                                 | 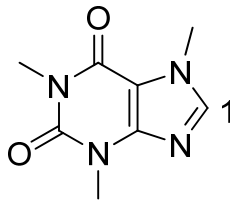   | 54.4 <sup>e</sup>      |
| Theophylline (d)                                                                                                                                                                                                                                                                                                                                                                                                             |    | 57.1 <sup>e</sup>      |
| Average:                                                                                                                                                                                                                                                                                                                                                                                                                     |                                                                                     | 55.8                   |
| Standard deviation:                                                                                                                                                                                                                                                                                                                                                                                                          |                                                                                     | 1.9                    |
| $[\$(\text{[ch1]});!\$(\text{[ch1]1}:[\text{c}](-[\text{N}^3]-[\text{*}^2]):[\text{c}]:[\text{c}]:[\text{c}]:[\text{c}]1);$<br>$!\$(\text{[c]1}:[\text{c}]:[\text{c}]:[\text{c}](-[\text{N}^3]-[\text{*}^2]):[\text{c}]:[\text{c}]1);$<br>$\$(\text{[ch1]1}:[\text{c}](-[\text{N}^3]):[\text{c}]:[\text{c}]:[\text{c}]:[\text{c}]1),\$(\text{[c]1}:[\text{c}]:[\text{c}]:[\text{c}](-[\text{N}^3]):[\text{c}]:[\text{c}]1)]$ |                                                                                     | <b>Energy (kJ/mol)</b> |
| <i>N,N</i> -dimethylaniline (d) (1)                                                                                                                                                                                                                                                                                                                                                                                          |   | 58.8 <sup>f</sup>      |
| <i>N,N</i> -dimethylaniline (d) (2)                                                                                                                                                                                                                                                                                                                                                                                          |  | 60.2 <sup>f</sup>      |
| Average:                                                                                                                                                                                                                                                                                                                                                                                                                     |                                                                                     | 59.5                   |
| Standard deviation:                                                                                                                                                                                                                                                                                                                                                                                                          |                                                                                     | 0.9                    |
| $[\$(\text{[CX3]});!\$(\text{[CX3]}=[\text{CX3}]);!\$(\text{[CH0]});!\$(\text{[CX3]}(-[\text{*}^2])=[\text{CX3}]);$<br>$!\$(\text{[CX3]}=[\text{CX3}]-[\text{*}^2])]$                                                                                                                                                                                                                                                        |                                                                                     | <b>Energy (kJ/mol)</b> |
| Ethene (q)                                                                                                                                                                                                                                                                                                                                                                                                                   |  | 67.5 <sup>t</sup>      |
| 2-butene (d)                                                                                                                                                                                                                                                                                                                                                                                                                 |  | 63.6 <sup>f</sup>      |
| Average:                                                                                                                                                                                                                                                                                                                                                                                                                     |                                                                                     | 65.6                   |
| Standard deviation:                                                                                                                                                                                                                                                                                                                                                                                                          |                                                                                     | 2.7                    |
| $[\$(\text{[cH1]});!\$(\text{[c]}:[\text{\#16}])]$                                                                                                                                                                                                                                                                                                                                                                           |                                                                                     | <b>Energy (kJ/mol)</b> |



|                                                                                                                                                                                                                                                                                                                                                                    |                                                                                     |                        |
|--------------------------------------------------------------------------------------------------------------------------------------------------------------------------------------------------------------------------------------------------------------------------------------------------------------------------------------------------------------------|-------------------------------------------------------------------------------------|------------------------|
| Thiophene (d)                                                                                                                                                                                                                                                                                                                                                      | 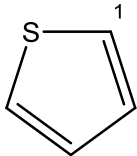   | 67.1                   |
| $[\$(\text{ch1});\$(\text{c1}:\text{c}:\text{c}:\text{c}:\text{c}(\sim\text{X2H0})\sim\text{c}^2,\text{C}^2):\text{c}:\text{c}1),$<br>$\$(\text{c1}:\text{c}:\text{c}:\text{c}:\text{c}(\sim\text{X3H1})\sim\text{c}^2,\text{C}^2):\text{c}:\text{c}1);$<br>$!\$(\text{c1}:\text{c}:\text{c}:\text{c}:\text{c}(-\text{NH})-\text{C}=\text{O}):\text{c}:\text{c}1]$ |                                                                                     | <b>Energy (kJ/mol)</b> |
| Diphenylamine (d)                                                                                                                                                                                                                                                                                                                                                  |    | 64.9                   |
| Tacrine (d)                                                                                                                                                                                                                                                                                                                                                        |    | 68.6 <sup>e</sup>      |
| 2,6-dichloro-N-o-tolylaniline (d) (1)                                                                                                                                                                                                                                                                                                                              |   | 69.3 <sup>f</sup>      |
| 2,6-dichloro-N-o-tolylaniline (d) (2)                                                                                                                                                                                                                                                                                                                              |  | 73.9 <sup>f</sup>      |
| Average:                                                                                                                                                                                                                                                                                                                                                           |                                                                                     | 69.2                   |
| Standard deviation:                                                                                                                                                                                                                                                                                                                                                |                                                                                     | 3.7                    |
| $[\$(\text{ch1});!\$(\text{c1}:\text{c}:\text{c}:\text{c}:\text{c}(-\text{O})-\text{C}=\text{O}):\text{c}:\text{c}1);$<br>$\$(\text{c1}:\text{c}:\text{c}:\text{c}:\text{c}(-\text{NH})-\text{C}=\text{O}):\text{c}:\text{c}1),$<br>$\$(\text{c1}:\text{c}:\text{c}:\text{c}:\text{c}(-\text{O},\text{SX2}):\text{c}:\text{c}1]$                                   |                                                                                     | <b>Energy (kJ/mol)</b> |
| Anisole (d)                                                                                                                                                                                                                                                                                                                                                        |  | 74.4                   |

|                                                                                                                                                                                                                                                                                                                                                                                   |                                                                                     |                        |
|-----------------------------------------------------------------------------------------------------------------------------------------------------------------------------------------------------------------------------------------------------------------------------------------------------------------------------------------------------------------------------------|-------------------------------------------------------------------------------------|------------------------|
| Methyl(phenyl)sulfane (d)                                                                                                                                                                                                                                                                                                                                                         | 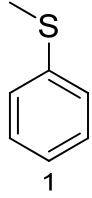   | 74.3                   |
| Phenol (d)                                                                                                                                                                                                                                                                                                                                                                        |    | 75.9                   |
| N-phenylacetamide (d)                                                                                                                                                                                                                                                                                                                                                             |    | 76.7                   |
| Average:                                                                                                                                                                                                                                                                                                                                                                          |                                                                                     | 75.3                   |
| Standard deviation:                                                                                                                                                                                                                                                                                                                                                               |                                                                                     | 1.2                    |
| $[\$(\text{[ch1]}); \$(\text{[c]1}:\text{[c]}:\text{[#16]}:\text{[c]}:\text{[c]1})]$                                                                                                                                                                                                                                                                                              |                                                                                     | <b>Energy (kJ/mol)</b> |
| Thiophene (d)                                                                                                                                                                                                                                                                                                                                                                     |  | 76.7                   |
| $[\$(\text{[ch1]}); \$(\text{[ch1]1}:\text{[c]}(\sim\text{[#7X2H0]}\sim\text{[c]^2,C^2}):\text{[c]}:\text{[c]}:\text{[c]}:\text{[c]1}),$<br>$\$(\text{[ch1]1}:\text{[c]}(\sim\text{[#7X3H1]}\sim\text{[c]^2,C^2}):\text{[c]}:\text{[c]}:\text{[c]}:\text{[c]1}),$<br>$\$(\text{[ch1]}:\text{[c]}-\text{[O,SX2]}); !\$(\text{[ch1]}:\text{[c]}-\text{[O]}-\text{[C]}=\text{[O]})]$ |                                                                                     | <b>Energy (kJ/mol)</b> |
| Anisole (d)                                                                                                                                                                                                                                                                                                                                                                       |  | 78.2                   |
| Methyl(phenyl)sulfane (d)                                                                                                                                                                                                                                                                                                                                                         |  | 77.2                   |

|                                                                                                                                                                                                                                                                       |                                                                                     |                        |
|-----------------------------------------------------------------------------------------------------------------------------------------------------------------------------------------------------------------------------------------------------------------------|-------------------------------------------------------------------------------------|------------------------|
| Tacrine (d)                                                                                                                                                                                                                                                           | 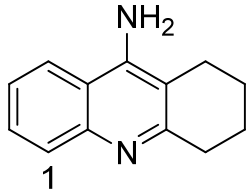   | 76.5 <sup>e</sup>      |
| 7-ethoxyresorufin (d)                                                                                                                                                                                                                                                 |   | 77.3 <sup>e</sup>      |
| Average:                                                                                                                                                                                                                                                              |                                                                                     | 77.3                   |
| Standard deviation:                                                                                                                                                                                                                                                   |                                                                                     | 0.7                    |
| $[\$(\text{CX3H1},\text{cX3H1})];!\$(\text{ch1})1:[\text{c}]:[\text{c}]:[\#7]:[\text{c}]:[\text{c}1];$<br>$!\$(\text{ch1})1:[\text{c}]:[\#7]:[\text{c}]:[\text{c}]:[\text{c}1];!\$(\text{ch1})1:[\text{c}]:[\#7]:[\text{c}]:[\text{c}1];$<br>$!\$(\text{ch1}:[\#7])]$ |                                                                                     | <b>Energy (kJ/mol)</b> |
| Penta-1,3-diene (d)                                                                                                                                                                                                                                                   |    | 81.8                   |
| Hepta-1,3,5-triene (q)                                                                                                                                                                                                                                                |   | 77.0                   |
| Anisole (d)                                                                                                                                                                                                                                                           |   | 85.8                   |
| Methyl(phenyl)sulfane (d)                                                                                                                                                                                                                                             |  | 87.1                   |
| Tacrine (d)                                                                                                                                                                                                                                                           |  | 82.0 <sup>e</sup>      |
| Benzene (d)                                                                                                                                                                                                                                                           |  | 87.3 <sup>f</sup>      |

|                                 |                                                                                     |                   |
|---------------------------------|-------------------------------------------------------------------------------------|-------------------|
| Warfarin (d) (1)                | 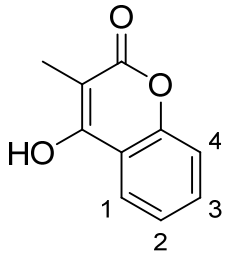   | 83.4 <sup>f</sup> |
| Warfarin (d) (2)                |    | 80.8 <sup>f</sup> |
| Warfarin (d) (3)                |    | 81.0 <sup>f</sup> |
| Warfarin (d) (4)                |   | 78.7 <sup>f</sup> |
| <i>N,N</i> -dimethylaniline (d) |  | 86.7 <sup>f</sup> |
| Nitrobenzene (q) (1)            |  | 78.5 <sup>f</sup> |
| Nitrobenzene (d) (2)            |  | 84.5 <sup>f</sup> |

|                                                                                                                                               |                                                                                     |                        |
|-----------------------------------------------------------------------------------------------------------------------------------------------|-------------------------------------------------------------------------------------|------------------------|
| Nitrobenzene (q) (3)                                                                                                                          | 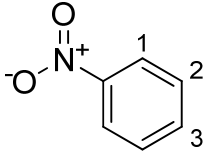   | 79.2 <sup>f</sup>      |
| 2-fluoro-4-methylbiphenyl (d)                                                                                                                 |    | 80.7 <sup>f</sup>      |
| Average:                                                                                                                                      |                                                                                     | 82.3                   |
| Standard deviation:                                                                                                                           |                                                                                     | 3.4                    |
| $[\$(\text{[ch1]1:[c]:[c]:[#7]:[c]:[c]1}),\$(\text{[ch1]1:[c]:[#7]:[c]:[c]:[c]1}),\$(\text{[ch1]1:[c]:[#7]:[c]:[c]1}),\$(\text{[ch1]:[#7]})]$ |                                                                                     | <b>Energy (kJ/mol)</b> |
| Pyridine (q) (1)                                                                                                                              |    | 90.6                   |
| Pyridine (d) (2)                                                                                                                              |   | 85.5                   |
| Pyridine (q) (3)                                                                                                                              |  | 92.6                   |
| Average:                                                                                                                                      |                                                                                     | 89.6                   |
| Standard deviation:                                                                                                                           |                                                                                     | 3.6                    |

<sup>a</sup> Transition state geometry from scan crossing point.

<sup>b</sup> Taken from the publication: P. Rydberg, U. Ryde, L. Olsen, *J. Chem. Theory Comput.* 2008, 4, 1369-1377

<sup>c</sup> Energy taken from the calculation with the small basis set relative to reactant complex.

<sup>d</sup> Taken from the publication: L. Olsen, P. Rydberg, TH. Rod, U. Ryde, *J. Med. Chem.* 2006, 49, 6489-6499.

<sup>e</sup> Taken from the publication: P. Rydberg, P. Vasanthanathan, C. Oostenbrink, L. Olsen, *ChemMedChem* 2009, 4, 2070-2079.

<sup>f</sup> Taken from the publication: P. Rydberg, U. Ryde, L. Olsen, *J. Phys. Chem. A* 2008, 112, 13058-13065.
